# Supplementary material
Source: publisher site journal article supplement (https://www.spandidos-publications.com/5477/downloadSupplementary)
Supplement: Supplementary file 1 [file downloadSupplementary]

## Supplementary tables

Table SI. Synthetic guide RNA for genome editing.

| Knock out/in gene               | Synthetic guide RNA        |
|---------------------------------|----------------------------|
| <i>TAP2</i> KO                  | 5'-GGGGGCUGCUAAAGCUAAGA-3' |
| <i>HLA-A*24:02:01:01</i> KO     | 5'-GAGUAUUGGGACGAGGAGAC-3' |
| <i>HLA-B*35:08:01</i> KO        | 5'-GCUGUCGAACCUCACGAACU-3' |
| <i>HLA-C*04:01:01:06</i> KO     | 5'-GACACAGAAGUACAAGCGCC-3' |
| <i>HLA allele</i> cDNA knock-in | 5'-CCCUCGUCCUGCUACUCUCG-3' |
|                                 | 5'-CCUGGGCACUGUCACUGCCU-3' |

Table SII. Synthetic primers for PCR and gene sequencing.

| Sequencing target               | Primer for PCR and Sequencing                     | Amplicon size, bp     | T <sub>m</sub> , °C <sup>a</sup> |
|---------------------------------|---------------------------------------------------|-----------------------|----------------------------------|
| <i>TAP2</i> KO                  | Forward: 5'-GATTTCTCATCTCGTATCCGTTGACA-3'         |                       | 64.6                             |
|                                 | Reverse: 5'-CTCAGAACAGCCCACAGTGA-3'               | 390                   | 61.3                             |
| <i>HLA-A</i> KO                 | Forward: 5'-GGGACTCAGATTCTCCCCAGA-3' <sup>b</sup> |                       | 62.3                             |
|                                 | Reverse: 5'-GATCTCGGACCCGGAGACTGT-3'              | 589                   | 64.8                             |
| <i>HLA-B</i> KO                 | Forward: 5'-GGGAGGGAAATGGCCTCTGT-3'               |                       | 61.8                             |
|                                 | Reverse: 5'-TCAACTGAAAATGAAACCGGGTAAAC-3'         | 556                   | 63.7                             |
| <i>HLA-C</i> KO                 | Forward: 5'-GGGACTCAGATTCTCCCCAGA-3' <sup>c</sup> |                       | 62.3                             |
|                                 | Reverse: 5'-GATCTCAGACGGGGAGACTCG-3'              | 591                   | 62.8                             |
| Each <i>HLA-allele</i> knock-in | Forward: 5'-TTCTCCCTCTCCCAACCTATGTAG-3'           |                       | 62.3                             |
|                                 | Reverse: 5'-CATGAACAACCTTCATATCTGTACAGTGAG-3'     | 3,055 (wild)          | 63.2                             |
|                                 |                                                   | 1,419 (cDNA knock-in) |                                  |
|                                 |                                                   | <0.5k(locus deleted)  |                                  |
|                                 | Reverse: 5'-CGCGGCTCCATCCTCTG-3' <sup>d</sup>     | 519 (wild),           | 61.7                             |

389 (cDNA knock-in)

None (locus deleted)

---

<sup>a</sup>The melting temperatures were predicted using Tm calculator tool at Thermo Scientific website. <sup>bc</sup>HLA-A, -C shared primer. <sup>d</sup>Reverse primer for short PCR products to confirm that the HLA-A\*24:02:01:01 locus is not remaining. Tm, melting temperature.

---

Table SIII. Synthesized peptides

| Gene        | AAS position | Peptide sequence <sup>a</sup> | Length              |
|-------------|--------------|-------------------------------|---------------------|
| <i>KRAS</i> | A146T        | ETST <u>K</u> TRQR            | 9                   |
|             |              | GIPFIETST <u>K</u>            | 10                  |
|             | G12A         | KLVVVGA <u>A</u> GV           | 10                  |
|             |              | LVVVGA <u>A</u> GV            | 9                   |
|             |              | TEYKLVVVGA <u>A</u>           | 11                  |
|             |              | VVGA <u>A</u> GVGK            | 9                   |
|             |              | G12C                          | KLVVVGAC <u>G</u> V |
|             | G12C         | LVVVGAC <u>G</u> V            | 9                   |
|             |              | VVGAC <u>G</u> VGK            | 9                   |
|             |              | VVVGAC <u>G</u> VGK           | 10                  |
|             |              | G12D                          | KLVVVGAD <u>G</u> V |
|             | G12D         | VVGAD <u>G</u> VGK            | 9                   |
|             |              | VVVGAD <u>G</u> VGK           | 10                  |
|             |              | G12R                          | EYKLVVVGAR <u>R</u> |
|             | G12R         | GAR <u>R</u> GVGKSAL          | 10                  |
|             |              | KLVVVGAR <u>R</u> GV          | 10                  |
|             |              | VVGAR <u>R</u> GVGK           | 9                   |
|             |              | VVVGAR <u>R</u> GVGK          | 10                  |
|             | G12S         | KLVVVGA <u>S</u> GV           | 10                  |
|             |              | LVVVGA <u>S</u> GV            | 9                   |
|             |              | VVGA <u>S</u> GVGK            | 9                   |

|                         |       |                      |    |
|-------------------------|-------|----------------------|----|
|                         | G12V  | GAVGVGKSAL           | 10 |
|                         |       | KLVVVGAVGV           | 10 |
|                         |       | LVVVGAVGV            | 9  |
|                         |       | TEYKLVVVGA <u>V</u>  | 11 |
|                         |       | VVGAVGVGK            | 9  |
|                         |       | VVVGA <u>V</u> GVGK  | 10 |
|                         | G13D  | KLVVVGAGD <u>V</u>   | 10 |
|                         |       | VVGAGD <u>V</u> GK   | 9  |
|                         |       | VVVGAGD <u>V</u> GK  | 10 |
| <i>KRAS, NRAS, HRAS</i> | Q61H  | AG <u>H</u> EEYSAM   | 9  |
|                         |       | DTAG <u>H</u> EEYSAM | 11 |
|                         | Q61L  | DILDTAG <u>L</u> EEY | 11 |
|                         |       | DTAG <u>L</u> EEYSAM | 11 |
|                         |       | LLDILDTAG <u>L</u>   | 10 |
|                         | Q61R  | AG <u>R</u> EEYSAMR  | 10 |
|                         |       | DTAG <u>R</u> EEYSAM | 11 |
| <i>TP53</i>             | C135F | ALNKMFF <u>Q</u> L   | 9  |
|                         |       | <u>F</u> QLAKTCPV    | 9  |
|                         |       | KMFF <u>Q</u> LAK    | 8  |
|                         |       | KMFF <u>Q</u> LAKT   | 9  |
|                         |       | LNKMFF <u>Q</u> LAK  | 10 |
|                         |       | SPALNKMFF <u>Q</u>   | 9  |
|                         |       | SPALNKMFF <u>Q</u> L | 11 |
|                         |       | TYSPALNKMFF <u>Q</u> | 11 |

|       |                      |    |
|-------|----------------------|----|
|       | YSPALNKMF <u>E</u>   | 10 |
| C176F | EVVRR <u>F</u> PHH   | 9  |
|       | HMTEVVRR <u>E</u>    | 9  |
|       | VVRR <u>F</u> PHHER  | 10 |
| G245D | NSSCMG <u>D</u> MNR  | 10 |
|       | SSCMG <u>D</u> MNR   | 9  |
| G245S | G <u>S</u> MNRRPIL   | 9  |
|       | SCMG <u>S</u> MNRR   | 9  |
|       | SSCMG <u>S</u> MNR   | 9  |
|       | SSCMG <u>S</u> MNRR  | 10 |
| H179R | EVVRRCP <u>H</u> R   | 9  |
|       | <u>R</u> ERCSDSDGL   | 10 |
|       | VVRRCP <u>H</u> RER  | 10 |
| H193R | <u>R</u> LIRVEGNLR   | 10 |
| M237I | NY <u>I</u> CNSSCM   | 9  |
|       | YNY <u>I</u> CNSSCM  | 10 |
| R110L | SYGF <u>L</u> LGFL   | 8  |
|       | SYGF <u>L</u> LGFL   | 9  |
|       | TYQGSYG <u>F</u> L   | 9  |
|       | TYQGSYG <u>F</u> LL  | 10 |
| R158L | GTRV <u>L</u> AMAIY  | 10 |
|       | RV <u>L</u> AMAIYK   | 9  |
|       | TPPPGTRV <u>L</u>    | 9  |
| R175H | EVVR <u>H</u> CPHHER | 11 |

|       |                      |    |
|-------|----------------------|----|
|       | VVR <u>H</u> CPHHER  | 10 |
| R248Q | MNQR <u>P</u> ILTII  | 10 |
|       | NQR <u>P</u> ILTII   | 9  |
|       | NSSCMGGMN <u>Q</u> R | 11 |
|       | <u>Q</u> RPILTIITL   | 10 |
|       | SCMGGMN <u>Q</u> R   | 9  |
|       | SSCMGGMN <u>Q</u> R  | 10 |
| R248W | GMN <u>W</u> RPILTI  | 10 |
|       | MN <u>W</u> RPILTI   | 9  |
|       | N <u>W</u> RPILTII   | 9  |
|       | SSCMGGMN <u>W</u> R  | 10 |
|       | <u>W</u> RPILTIITL   | 10 |
| R249S | NR <u>S</u> PILTII   | 9  |
|       | R <u>S</u> PILTIITL  | 10 |
|       | <u>S</u> PILTIITL    | 9  |
| R273C | EV <u>C</u> VCACPGR  | 10 |
|       | LLGRNSFEV <u>C</u> V | 11 |
| R273H | EV <u>H</u> VCACPGR  | 10 |
|       | LLGRNSFEV <u>H</u> V | 11 |
|       | NSFEV <u>H</u> VCA   | 9  |
| R282W | CACPGRD <u>W</u> R   | 9  |
|       | RVCACPGRD <u>W</u> R | 11 |
| Y163C | RVRAMA <u>C</u> ICK  | 9  |
|       | TRVRAMA <u>C</u> ICK | 10 |

|               |               |                             |    |
|---------------|---------------|-----------------------------|----|
|               | Y220C         | VVP <u>C</u> EPPEV          | 9  |
|               |               | VVVP <u>C</u> EPPEV         | 10 |
| <i>PIK3CA</i> | C420R         | AKEEHR <u>P</u> LAW         | 10 |
|               |               | GAKEEHR <u>P</u> L          | 9  |
|               |               | <u>R</u> PLAWGNINL          | 10 |
|               | E542K         | AISTRDPL <u>S</u> K         | 10 |
|               |               | ISTRDPL <u>S</u> K          | 9  |
|               |               | KAISTRDPL <u>S</u> K        | 11 |
|               |               | STRDPL <u>S</u> KI          | 9  |
|               |               | STRDPL <u>S</u> EITK        | 11 |
|               | H1047L        | AL <u>H</u> GGWTTK          | 9  |
|               |               | AL <u>H</u> GGWTTKM         | 10 |
|               |               | FMKQMNDAL <u>L</u>          | 9  |
|               |               | <u>L</u> HGGWTTKM           | 9  |
|               | H1047R        | EYFMKQMNDAR <u>R</u>        | 11 |
|               |               | FMKQMNDAR <u>R</u>          | 9  |
|               |               | YFMKQMNDAR <u>R</u>         | 10 |
|               | R88Q          | EFFDETR <u>Q</u> L          | 9  |
|               |               | ETR <u>Q</u> LCDLR          | 9  |
|               |               | ETR <u>Q</u> LCDLRLF        | 11 |
|               |               | FFDETR <u>Q</u> L           | 8  |
|               |               | REEFFDETR <u>Q</u> L        | 11 |
|               |               | R <u>Q</u> LCDLRLF          | 9  |
| <i>EGFR</i>   | E746_A750.del | IPVA <u>I</u> K <u>T</u> SP | 9  |

|                        |       |                       |    |
|------------------------|-------|-----------------------|----|
|                        |       | IPVAIK <u>T</u> SPKA  | 11 |
|                        |       | AIK <u>T</u> SPKANK   | 10 |
|                        |       | IPVAIK <u>T</u> SPK   | 10 |
|                        | L858R | HVKITDFG <u>R</u>     | 9  |
|                        |       | ITDFG <u>R</u> AKL    | 9  |
|                        |       | KITDFG <u>R</u> AK    | 9  |
|                        |       | QHVKITDFG <u>R</u>    | 10 |
|                        | T790M | LTSTVQL <u>I</u> M    | 9  |
|                        |       | <u>M</u> QLMPFGCLL    | 10 |
|                        |       | QL <u>I</u> MQLMPF    | 9  |
|                        |       | STVQL <u>I</u> MQL    | 9  |
|                        |       | TVQL <u>I</u> MQLM    | 9  |
|                        |       | VQL <u>I</u> MQLMPF   | 10 |
| <i>BRAF</i>            | D594G | DLTVKIG <u>G</u> F    | 9  |
|                        |       | <u>G</u> FGLATVKSR    | 10 |
|                        |       | <u>G</u> GFGLATVK     | 9  |
|                        |       | KIG <u>G</u> FGLATV   | 10 |
|                        |       | KIG <u>G</u> FGLATVK  | 11 |
|                        |       | TVKIG <u>G</u> FGLA   | 10 |
|                        | V600E | DFGLATE <u>E</u> KSR  | 10 |
|                        |       | KIGDFGLATE <u>E</u> K | 11 |
| CMV- <i>UL83</i> (A02) | -     | NLVPMVATV             | 9  |
| CMV- <i>UL83</i> (A24) | -     | QYDPVAALF             | 9  |

---

<sup>a</sup>Underlined letters mean AAS positions. AAS, amino acid substitution.

---

Table SIV. Mutation frequencies of major five cancer driver genes in the HOPE cohort and TCGA.

| Gene symbol | AAS position | HOPE,<br>/5,143 cases | TCGA,<br>/24,592 cases | %HOPE/%TCGA<br>ratio |
|-------------|--------------|-----------------------|------------------------|----------------------|
| <i>KRAS</i> | G12D         | 336                   | 757                    | 2.12                 |
|             | G12V         | 204                   | 657                    | 1.48                 |
|             | G13D         | 162                   | 214                    | 3.55                 |
|             | G12C         | 82                    | 384                    | 1.02                 |
|             | G12A         | 55                    | 134                    | 1.96                 |
|             | G12S         | 55                    | 68                     | 3.87                 |
|             | A146T        | 46                    | 65                     | 3.38                 |
|             | Q61H         | 36                    | 108                    | 1.59                 |
|             | G12R         | 16                    | 166                    | 0.46                 |
|             | Q61L         | 16                    | 21                     | 3.64                 |
|             | K117N        | 14                    | 17                     | 3.94                 |
|             | Q61R         | 14                    | 37                     | 1.68                 |
|             | G13C         | 11                    | 32                     | 1.64                 |
| <i>TP53</i> | R175H        | 159                   | 386                    | 1.97                 |
|             | R273H        | 106                   | 251                    | 2.02                 |
|             | R282W        | 106                   | 201                    | 2.50                 |
|             | R273C        | 93                    | 283                    | 1.57                 |
|             | R248Q        | 85                    | 292                    | 1.39                 |
|             | G245S        | 67                    | 128                    | 2.50                 |

|               |        |     |     |      |
|---------------|--------|-----|-----|------|
|               | R248W  | 60  | 222 | 1.29 |
|               | Y220C  | 55  | 127 | 2.07 |
|               | M237I  | 17  | 55  | 1.48 |
|               | C176F  | 16  | 54  | 1.42 |
|               | I195T  | 16  | 42  | 1.82 |
|               | H179R  | 15  | 63  | 1.14 |
|               | G245D  | 15  | 50  | 1.43 |
|               | H193R  | 14  | 54  | 1.24 |
|               | Y234C  | 13  | 42  | 1.48 |
|               | P152L  | 13  | 28  | 2.22 |
|               | R158L  | 12  | 42  | 1.37 |
|               | R249S  | 12  | 45  | 1.28 |
|               | R158H  | 12  | 36  | 1.59 |
|               | V157F  | 11  | 67  | 0.79 |
|               | Y163C  | 11  | 54  | 0.97 |
|               | R110L  | 11  | 25  | 2.10 |
|               | C135F  | 11  | 24  | 2.19 |
| <i>PIK3CA</i> | H1047R | 127 | 537 | 1.13 |
|               | E545K  | 102 | 575 | 0.85 |
|               | E542K  | 74  | 356 | 0.99 |
|               | R88Q   | 34  | 75  | 2.17 |
|               | H1047L | 22  | 85  | 1.24 |
|               | C420R  | 20  | 46  | 2.08 |
|               | Q546K  | 13  | 35  | 1.78 |

|             |                    |     |     |      |
|-------------|--------------------|-----|-----|------|
|             | R108H              | 12  | 25  | 2.30 |
| <i>EGFR</i> | L858R              | 122 | 144 | 4.05 |
|             | E746_A750 deletion | 74  | 123 | 2.88 |
|             | L747_P753 deletion | 12  | 8   | 7.17 |
|             | insertion S        |     |     |      |
|             | G719A              | 11  | 18  | 2.92 |
|             | T790M              | 1   | 59  | 0.08 |
| <i>BRAF</i> | V600E              | 105 | 833 | 0.60 |
|             | D594G              | 12  | 21  | 2.73 |

---

AAS, amino acid substitution; HOPE, High-tech Omics-based Patient Evaluation project in Shizuoka Cancer Center; TCGA, The Cancer Genome Atlas.

---

Table SV. MHC-stabilization assay with the synthesized peptides.

| A, HLA-A*02:01 |             |              |                    |                       |                       |          |                           |             |
|----------------|-------------|--------------|--------------------|-----------------------|-----------------------|----------|---------------------------|-------------|
| Peptide ID     | Gene        | AAS position | Freq. <sup>a</sup> | Sequence <sup>b</sup> | BA_model              | EL_model | $\Delta$ HLA <sup>c</sup> |             |
|                |             |              |                    |                       | IC <sub>50</sub> , nM | %Rank    | Aver., %                  | $\pm$ SD, % |
| 1              | <i>KRAS</i> | G12D         | 336                | KLVVVGAD <u>G</u> V   | 280                   | 3.80     | 24.1                      | 3.7         |
| 2              |             |              |                    | VVGAD <u>G</u> VGK    | 35,485                | 29.00    | 5.6                       | 3.4         |
| 5              |             | G12V         | 204                | KLVVVGAV <u>G</u> V   | 175                   | 2.10     | 34.8                      | 7.6         |
| 6              |             |              |                    | LVVVGAV <u>G</u> V    | 553                   | 2.30     | 2.4                       | 4.1         |
| 7              |             |              |                    | VVGAV <u>G</u> VGK    | 30,145                | 21.00    | -0.3                      | 1.0         |
| 9              |             | G13D         | 159                | KLVVVGAG <u>D</u> V   | 348                   | 4.50     | 9.6                       | 3.0         |
| 12             |             | G12C         | 82                 | KLVVVGAC <u>G</u> V   | 167                   | 4.00     | 32.6                      | 4.6         |
| 13             |             |              |                    | LVVVGAC <u>G</u> V    | 596                   | 5.10     | 1.8                       | 2.2         |
| 14             |             |              |                    | VVGAC <u>G</u> VGK    | 30,282                | 32.00    | 3.4                       | 0.7         |
| 16             |             | G12A         | 55                 | TEYKLVVVGAA <u>A</u>  | 36,323                | 43.00    | 1.1                       | 4.4         |
| 17             |             |              |                    | KLVVVGAA <u>G</u> V   | 180                   | 3.20     | 22.8                      | 5.3         |

|    |                                   |       |     |                                                      |        |       |      |     |
|----|-----------------------------------|-------|-----|------------------------------------------------------|--------|-------|------|-----|
| 18 |                                   |       |     | L <u>V</u> V <u>V</u> G <u>A</u> <u>A</u> GV         | 559    | 3.30  | 1.6  | 3.9 |
| 20 |                                   | G12S  | 55  | KL <u>V</u> V <u>V</u> G <u>A</u> <u>S</u> GV        | 258    | 3.20  | 26.4 | 6.8 |
| 21 |                                   |       |     | L <u>V</u> V <u>V</u> G <u>A</u> <u>S</u> GV         | 1532   | 4.20  | -8.9 | 1.3 |
| 26 |                                   | G12R  | 16  | KL <u>V</u> V <u>V</u> G <u>A</u> <u>R</u> GV        | 343    | 4.00  | 4.0  | 1.0 |
| 29 |                                   |       |     | G <u>A</u> <u>R</u> <u>G</u> <u>V</u> G <u>K</u> SAL | 32,222 | 22.00 | 2.4  | 3.0 |
| 30 | <i>KRAS,</i><br><i>NRAS, HRAS</i> | Q61L  | 16  | LLDILDTAG <u>L</u>                                   | 113    | 1.80  | 7.3  | 7.7 |
| 33 | <i>TP53</i>                       | R273H | 106 | LLGRNSFEV <u>H</u> V                                 | 199    | 1.40  | 4.5  | 6.4 |
| 37 |                                   | R273C | 93  | LLGRNSFEV <u>C</u> V                                 | 385    | 4.00  | 9.1  | 4.8 |
| 40 |                                   | R248Q | 85  | MN <u>Q</u> RPILTII                                  | 9,443  | 17.00 | 2.3  | 5.3 |
| 47 |                                   | R248W | 60  | GMN <u>W</u> RPILTI                                  | 125    | 1.50  | 12.4 | 2.8 |
| 48 |                                   |       |     | MN <u>W</u> RPILTI                                   | 4,792  | 5.30  | 2.0  | 5.1 |
| 50 |                                   | Y220C | 55  | V <u>V</u> P <u>C</u> EPPEV                          | 564    | 0.55  | 25.9 | 6.8 |
| 53 |                                   | C176F | 16  | HMTEV <u>V</u> RR <u>F</u>                           | 9,077  | 1.90  | -0.5 | 3.2 |
| 60 |                                   | H193R | 14  | <u>R</u> LIRVEGNLR                                   | 9,876  | 18.00 | 3.2  | 2.3 |

|     |               |        |     |                              |        |       |      |      |
|-----|---------------|--------|-----|------------------------------|--------|-------|------|------|
| 63  |               | R249S  | 12  | R <u>S</u> PILTIITL          | 5,043  | 7.90  | 2.6  | 8.8  |
| 66  |               | C135F  | 11  | SPALNKMFF <u>Q</u> L         | 903    | 3.70  | 22.1 | 3.5  |
| 67  |               |        |     | ALNKMFF <u>Q</u> L           | 16     | 0.10  | 15.7 | 10.4 |
| 69  |               |        |     | KMFF <u>Q</u> LAKT           | 196    | 1.30  | 4.3  | 3.7  |
| 71  |               |        |     | <u>F</u> QLAKTCPV            | 7      | 0.58  | 43.9 | 2.2  |
| 75  |               | R110L  | 11  | TYQGSYG <u>F</u> LL          | 1,895  | 11.00 | 2.6  | 2.7  |
| 82  | <i>PIK3CA</i> | E545K  | 102 | SEIT <u>K</u> QEKDF          | 42,566 | 40.00 | 3.8  | 1.6  |
| 88  |               | R88Q   | 34  | R <u>Q</u> LCDLRLF           | 6,147  | 9.30  | 9.3  | 4.6  |
| 89  |               | H1047L | 22  | FMKQMND <u>A</u> L           | 89     | 0.58  | 2.5  | 5.2  |
| 90  |               |        | 22  | AL <u>H</u> GGWTTKM          | 3,156  | 2.10  | 4.0  | 4.5  |
| 92  |               | C420R  | 20  | AKEE <u>H</u> RPLAW          | 44,117 | 42.00 | 1.9  | 1.1  |
| 93  |               |        |     | <u>R</u> PLAWGNINL           | 270    | 1.30  | 6.1  | 4.0  |
| 97  | <i>EGFR</i>   | L858R  | 122 | ITDFG <u>R</u> AKL           | 7,344  | 2.80  | 0.1  | 4.0  |
| 100 |               | T790M  | 1   | LTSTV <u>Q</u> LIM           | 8,044  | 8.30  | 3.5  | 7.7  |
| 102 |               |        |     | V <u>Q</u> LIM <u>Q</u> LMPF | 5,635  | 25.00 | 8.7  | 6.1  |

|            |                  |       |    |             |        |       |      |      |
|------------|------------------|-------|----|-------------|--------|-------|------|------|
| 103        |                  |       |    | QLIMQLMPF   | 2,774  | 7.00  | 5.1  | 8.4  |
| 104        |                  |       |    | MQLMPFGCLL  | 26     | 2.20  | 45.7 | 8.1  |
| 107        | <i>BRAF</i>      | D594G | 12 | TVKIGGFGLA  | 5,356  | 9.10  | -2.9 | 2.2  |
| 108        |                  |       |    | KIGGFGLATVK | 4,026  | 12.00 | -1.4 | 1.2  |
| 109        |                  |       |    | KIGGFGLATV  | 44     | 0.77  | 42.6 | 21.3 |
| CMVpp65A02 | CMV- <i>UL83</i> | -     | -  | NLVPMVATV   | 18     | 0.06  | 56.6 | 7.9  |
| CMVpp65A24 | CMV- <i>UL83</i> | -     | -  | QYDPVAALF   | 17,364 | 3.30  | 3.1  | 2.2  |

---

B, HLA-A\*11:01

---

| Peptide ID | Gene        | AAS position | Freq. | Sequence   | BA_model              | EL_model | $\Delta$ HLA |             |
|------------|-------------|--------------|-------|------------|-----------------------|----------|--------------|-------------|
|            |             |              |       |            | IC <sub>50</sub> , nM | %Rank    | Aver., %     | $\pm$ SD, % |
| 1          | <i>KRAS</i> | G12D         | 336   | KLVVVGADGV | 33,137                | 53.00    | 15.5         | 5.0         |
| 2          |             |              |       | VVGADGVGK  | 172                   | 0.35     | 202.8        | 61.8        |
| 3          |             |              |       | VVVGADGVGK | 194                   | 0.59     | 236.3        | 69.0        |
| 7          |             | G12V         | 204   | VVGAVGVGK  | 39                    | 0.10     | 230.5        | 77.1        |
| 8          |             |              |       | VVVGAVGVGK | 69                    | 0.35     | 228.1        | 69.2        |

|    |             |       |     |                      |        |       |       |      |
|----|-------------|-------|-----|----------------------|--------|-------|-------|------|
| 10 |             | G13D  | 159 | VVVGAG <u>D</u> VGK  | 213    | 0.59  | 195.4 | 58.6 |
| 11 |             |       |     | VVGAG <u>D</u> VGK   | 314    | 0.60  | 181.2 | 43.4 |
| 14 |             | G12C  | 82  | VVGAC <u>G</u> VGK   | 73     | 0.52  | 234.3 | 72.6 |
| 15 |             |       |     | VVVGAC <u>G</u> VGK  | 122    | 0.59  | 123.4 | 30.1 |
| 19 |             | G12A  | 55  | VVGA <u>A</u> GVGK   | 60     | 0.18  | 218.5 | 65.1 |
| 22 |             | G12S  | 55  | VVGAS <u>G</u> VGK   | 51     | 0.15  | 219.1 | 66.6 |
| 23 |             | A146T | 46  | GIPFIETS <u>T</u> K  | 167    | 0.81  | 73.0  | 12.1 |
| 27 |             | G12R  | 16  | VVVGAR <u>G</u> VGK  | 162    | 0.55  | 198.4 | 60.9 |
| 28 |             |       |     | VVGAR <u>G</u> VGK   | 107    | 0.33  | 156.5 | 35.5 |
| 29 |             |       |     | GAR <u>G</u> VGKSAL  | 38,444 | 34.00 | 11.2  | 5.1  |
| 31 | <i>TP53</i> | R175H | 159 | VVRH <u>C</u> PHHER  | 2,073  | 3.10  | 68.9  | 12.2 |
| 35 |             | R282W | 105 | RVCACPGRD <u>W</u> R | 4,937  | 4.30  | 102.1 | 2.7  |
| 36 |             |       |     | CACPGRD <u>W</u> R   | 7,086  | 7.20  | 21.8  | 3.3  |
| 38 |             | R273C | 93  | EVC <u>V</u> CACPGR  | 8,971  | 19.00 | 11.5  | 3.8  |
| 39 |             | R248Q | 85  | SSCMGGMN <u>Q</u> R  | 171    | 0.49  | 88.7  | 9.5  |

|    |       |    |                      |       |      |       |       |
|----|-------|----|----------------------|-------|------|-------|-------|
| 41 |       |    | SCMGGMN <u>Q</u> R   | 5,475 | 2.00 | 275.5 | 89.6  |
| 42 |       |    | NSSCMGGMN <u>Q</u> R | 5,441 | 3.40 | 16.3  | 12.5  |
| 43 | G245S | 67 | SSCMG <u>S</u> MNRR  | 145   | 0.78 | 27.7  | 5.5   |
| 44 |       |    | SCMG <u>S</u> MNRR   | 5,603 | 2.70 | 224.0 | 100.7 |
| 45 |       |    | SSCMG <u>S</u> MNR   | 95    | 0.54 | 107.4 | 30.9  |
| 46 | R248W | 60 | SSCMGGMN <u>W</u> R  | 158   | 1.10 | 47.9  | 6.3   |
| 55 | C176F | 16 | VVRR <u>F</u> PHHER  | 3,614 | 3.90 | 25.6  | 17.8  |
| 56 | G245D | 15 | NSSCMG <u>D</u> MNR  | 2,611 | 6.60 | 18.8  | 10.4  |
| 57 |       |    | SSCMG <u>D</u> MNR   | 464   | 1.40 | 71.5  | 7.2   |
| 59 | H179R | 15 | VVRR <u>C</u> PHRER  | 9,157 | 7.70 | 28.6  | 6.8   |
| 60 | H193R | 14 | <u>R</u> LIRVEGNLR   | 1,956 | 3.30 | 10.6  | 4.7   |
| 61 | R158L | 12 | GTRV <u>L</u> AMAIY  | 2,509 | 5.20 | 8.6   | 1.9   |
| 62 |       |    | RV <u>L</u> AMAIYK   | 5     | 0.01 | 177.2 | 97.6  |
| 68 | C135F | 11 | LNKM <u>F</u> QLAK   | 257   | 4.20 | 20.5  | 7.6   |
| 70 |       |    | KM <u>F</u> QLAK     | 239   | 1.50 | 12.6  | 3.3   |

|     |               |              |     |                       |        |       |       |      |
|-----|---------------|--------------|-----|-----------------------|--------|-------|-------|------|
| 76  |               | Y163C        | 11  | TRVRAMA <u>I</u> CK   | 454    | 3.30  | 22.3  | 1.2  |
| 77  |               |              |     | RVRAMA <u>I</u> CK    | 72     | 0.44  | 111.4 | 11.4 |
| 81  | <i>PIK3CA</i> | E545K        | 102 | STRDPLSEIT <u>K</u>   | 92     | 0.04  | 80.0  | 32.7 |
| 82  |               |              |     | SEIT <u>K</u> QEKDF   | 40,671 | 32.00 | 7.5   | 3.2  |
| 84  |               | E542K        | 74  | AISTRDPL <u>S</u> K   | 99     | 0.25  | 79.9  | 9.1  |
| 85  |               |              |     | ISTRDPL <u>S</u> K    | 333    | 0.48  | 124.3 | 30.1 |
| 86  |               |              |     | KAISTRDPL <u>S</u> K  | 256    | 0.22  | 127.1 | 28.7 |
| 90  |               | H1047L       | 22  | AL <u>H</u> GGWTTKM   | 7,767  | 5.00  | 14.1  | 11.7 |
| 91  |               |              |     | AL <u>H</u> GGWTTK    | 121    | 0.19  | 76.2  | 15.7 |
| 92  |               | C420R        | 20  | AKEEHR <u>P</u> LAW   | 41,444 | 26.00 | 12.0  | 4.8  |
| 95  | <i>EGFR</i>   | L858R        | 122 | HVKITDF <u>G</u> R    | 4,596  | 3.00  | 109.0 | 17.6 |
| 96  |               |              |     | KITDF <u>G</u> RAK    | 101    | 0.19  | 51.8  | 10.6 |
| 98  |               | E746_A750del | 74  | IPVAI <u>K</u> TSPK   | 173    | 1.60  | 28.0  | 2.3  |
| 99  |               |              |     | AI <u>K</u> TSPKANK   | 423    | 0.54  | 73.1  | 12.7 |
| 105 | <i>BRAF</i>   | V600E        | 105 | KIGDFGLATE <u>E</u> K | 108    | 0.28  | 97.7  | 4.4  |

|            |          |       |    |                      |        |       |      |     |
|------------|----------|-------|----|----------------------|--------|-------|------|-----|
| 108        |          | D594G | 12 | KIG <u>G</u> FGLATVK | 212    | 0.67  | 32.3 | 4.7 |
| 110        |          |       |    | GG <u>F</u> GGLATVK  | 522    | 0.92  | 28.0 | 1.5 |
| CMVpp65A02 | CMV-UL83 | -     | -  | NLVPMVATV            | 31,807 | 25.00 | 8.3  | 2.3 |
| CMVpp65A24 | CMV-UL83 | -     | -  | QYDPVAALF            | 26,028 | 6.70  | 3.1  | 7.3 |

C, HLA-A\*24:02

| Peptide ID | Gene        | AAS position | Freq. | Sequence                     | BA_model              | EL_model | ΔHLA     |        |
|------------|-------------|--------------|-------|------------------------------|-----------------------|----------|----------|--------|
|            |             |              |       |                              | IC <sub>50</sub> , nM | %Rank    | Aver., % | ±SD, % |
| 29         | <i>KRAS</i> | G12R         | 16    | G <u>A</u> R <u>G</u> VGKSAL | 41,217                | 30.00    | -3.5     | 2.2    |
| 48         | <i>TP53</i> | R248W        | 60    | M <u>N</u> W <u>R</u> PILTI  | 5,038                 | 2.80     | 25.6     | 11.6   |
| 49         |             |              |       | N <u>W</u> R <u>P</u> ILTI   | 945                   | 0.53     | 31.9     | 6.0    |
| 51         |             | M237I        | 17    | Y <u>N</u> Y <u>I</u> CNSSCM | 953                   | 3.60     | 48.1     | 9.6    |
| 52         |             |              |       | NY <u>I</u> CNSSCM           | 1,054                 | 1.80     | 65.4     | 12.5   |
| 53         |             | C176F        | 16    | HMTEV <u>V</u> RR <u>F</u>   | 3,646                 | 0.40     | 37.6     | 10.4   |
| 63         |             | R249S        | 12    | R <u>S</u> PILTIITL          | 7,939                 | 3.00     | 7.7      | 6.0    |
| 64         |             | C135F        | 11    | TYSPAL <u>N</u> KM <u>F</u>  | 39                    | 0.01     | 69.9     | 15.0   |

|            |               |       |     |                     |        |       |      |      |
|------------|---------------|-------|-----|---------------------|--------|-------|------|------|
| 65         |               |       |     | YSPALNKMF <u>F</u>  | 1,256  | 1.70  | 37.0 | 11.0 |
| 67         |               |       |     | ALNKMF <u>F</u> QL  | 4,538  | 2.00  | 18.5 | 5.7  |
| 72         |               | R110L | 11  | SYG <u>F</u> LLGF   | 460    | 0.40  | 31.5 | 16.3 |
| 73         |               |       |     | SYG <u>F</u> LLGFL  | 174    | 0.45  | 20.8 | 6.1  |
| 74         |               |       |     | TYQGSYG <u>F</u> L  | 116    | 0.18  | 28.5 | 14.9 |
| 75         |               |       |     | TYQGSYG <u>F</u> LL | 22     | 0.15  | 22.9 | 12.0 |
| 82         | <i>PIK3CA</i> | E545K | 102 | SEIT <u>K</u> QEKDF | 34,856 | 6.80  | 2.0  | 6.5  |
| 88         |               | R88Q  | 34  | R <u>Q</u> LCDLRLF  | 496    | 0.96  | 26.3 | 13.4 |
| 92         |               | C420R | 20  | AKEE <u>H</u> RPLAW | 37,377 | 13.00 | 4.9  | 4.0  |
| 94         | <i>EGFR</i>   | L858R | 122 | QHVKITDF <u>G</u> R | 34,358 | 19.00 | 2.2  | 5.2  |
| 95         |               |       |     | HVKITDF <u>G</u> R  | 39,532 | 31.00 | 4.9  | 4.8  |
| 102        |               | T790M | 1   | V <u>Q</u> LIMQLMPF | 2,408  | 4.10  | 25.3 | 7.8  |
| 103        |               |       |     | Q <u>L</u> IMQLMPF  | 3,623  | 3.00  | 30.7 | 15.8 |
| 104        |               |       | 1   | <u>M</u> QLMPFGCLL  | 3,423  | 7.10  | 21.4 | 2.9  |
| CMVpp65A02 | CMV-UL83      | -     | -   | NLVPMVATV           | 23,900 | 9.10  | 5.3  | 3.5  |

CMVpp65A24 CMV-UL83 - - QYDPVAALF 67 0.01 60.8 7.3

D, HLA-A\*33:03

| Peptide ID | Gene        | AAS position | Freq. | Sequence             | BA_model              | EL_model | ΔHLA     |        |
|------------|-------------|--------------|-------|----------------------|-----------------------|----------|----------|--------|
|            |             |              |       |                      | IC <sub>50</sub> , nM | %Rank    | Aver., % | ±SD, % |
| 1          | <i>KRAS</i> | G12D         | 336   | KLVVVGAD <u>G</u> V  | 33,428                | 61.00    | 1.1      | 2.4    |
| 4          |             | G12V         | 204   | TEYKLVVVGA <u>V</u>  | 32,760                | 48.00    | 0.3      | 1.2    |
| 7          |             |              |       | VVGA <u>V</u> GVGK   | 5,218                 | 3.80     | 1.5      | 6.6    |
| 8          |             |              |       | VVVGA <u>V</u> GVGK  | 7,734                 | 5.20     | 2.6      | 5.5    |
| 9          |             | G13D         | 159   | KLVVVGAG <u>D</u> V  | 34,655                | 64.00    | -2.7     | 3.3    |
| 14         |             | G12C         | 82    | VVGAC <u>C</u> GVGK  | 7,482                 | 7.50     | 1.9      | 6.2    |
| 15         |             |              |       | VVVGAC <u>C</u> GVGK | 7,066                 | 7.20     | 3.3      | 3.1    |
| 19         |             | G12A         | 55    | VVGA <u>A</u> GVGK   | 9,264                 | 5.90     | -3.9     | 7.3    |
| 22         |             | G12S         | 55    | VVGAS <u>S</u> GVGK  | 9,492                 | 5.70     | 2.1      | 1.2    |
| 24         |             | A146T        | 46    | ETS <u>T</u> KTRQR   | 124                   | 0.05     | 11.4     | 7.3    |
| 25         |             | G12R         | 16    | EYKLVVVGAR <u>R</u>  | 35                    | 0.11     | 67.0     | 13.9   |

|    |             |       |     |                      |        |       |      |     |
|----|-------------|-------|-----|----------------------|--------|-------|------|-----|
| 27 |             |       |     | VVVGAR <u>G</u> VGK  | 5,640  | 5.30  | 5.5  | 3.9 |
| 28 |             |       |     | VVGAR <u>G</u> VGK   | 5,068  | 4.00  | 1.1  | 2.7 |
| 29 |             |       |     | GAR <u>G</u> VGKSAL  | 37,491 | 36.00 | 1.3  | 1.5 |
| 31 | <i>TP53</i> | R175H | 159 | VVRH <u>C</u> PHHER  | 79     | 0.29  | 24.9 | 7.7 |
| 32 |             |       |     | EVVRH <u>C</u> PHHER | 88     | 0.16  | 34.7 | 3.1 |
| 34 |             | R273H | 106 | EVH <u>V</u> CACPGR  | 68     | 1.60  | 49.6 | 7.9 |
| 35 |             | R282W | 105 | RVCACPGRD <u>W</u> R | 2,472  | 3.60  | 0.2  | 1.9 |
| 36 |             |       |     | CACPGRD <u>W</u> R   | 214    | 1.70  | 2.4  | 2.8 |
| 38 |             | R273C | 93  | EV <u>C</u> VCACPGR  | 87     | 2.60  | 26.6 | 7.2 |
| 39 |             | R248Q | 85  | SSCMGGMN <u>Q</u> R  | 268    | 0.51  | 2.6  | 2.4 |
| 41 |             |       |     | SCMGGMN <u>Q</u> R   | 312    | 0.35  | 12.3 | 5.7 |
| 42 |             |       |     | NSSCMGGMN <u>Q</u> R | 405    | 0.47  | -1.4 | 5.1 |
| 43 |             | G245S | 67  | SSCMG <u>S</u> MNRR  | 224    | 0.77  | 3.5  | 1.7 |
| 44 |             |       |     | SCMG <u>S</u> MNRR   | 297    | 0.47  | 2.6  | 4.9 |
| 45 |             |       |     | SSCMG <u>S</u> MNR   | 191    | 0.61  | 14.0 | 3.8 |

|    |               |        |     |                    |       |       |      |      |
|----|---------------|--------|-----|--------------------|-------|-------|------|------|
| 46 |               | R248W  | 60  | SSCMGGMN <u>WR</u> | 151   | 1.10  | 1.3  | 2.7  |
| 54 |               | C176F  | 16  | EVVRRF <u>PHH</u>  | 2,113 | 1.40  | -0.2 | 3.2  |
| 55 |               |        |     | VVRRF <u>PHHER</u> | 83    | 0.35  | 11.1 | 0.9  |
| 56 |               | G245D  | 15  | NSSCMG <u>DMNR</u> | 359   | 2.70  | 2.1  | 0.2  |
| 57 |               |        |     | SSCMG <u>DMNR</u>  | 376   | 1.40  | 1.4  | 5.3  |
| 58 |               | H179R  | 15  | EVVRRCP <u>HR</u>  | 40    | 0.11  | 33.2 | 8.2  |
| 59 |               |        |     | VVRRCP <u>HRER</u> | 406   | 1.30  | 11.8 | 2.0  |
| 60 |               | H193R  | 14  | <u>RLIR</u> VEGNLR | 783   | 2.00  | 0.8  | 0.6  |
| 62 |               | R158L  | 12  | RV <u>L</u> AMAIYK | 1,626 | 2.60  | 1.6  | 4.2  |
| 68 |               | C135F  | 11  | LNKMFF <u>QLAK</u> | 2,737 | 7.10  | 1.0  | 2.2  |
| 70 |               |        |     | KMFF <u>QLAK</u>   | 9,201 | 8.30  | 1.5  | 3.7  |
| 75 |               | R110L  | 11  | TYQGSYG <u>FLL</u> | 8,375 | 11.00 | 2.6  | 3.7  |
| 76 |               | Y163C  | 11  | TRVRAMA <u>ICK</u> | 4,680 | 7.10  | 4.6  | 1.8  |
| 77 |               |        |     | RVRAMA <u>ICK</u>  | 2,119 | 3.30  | -2.4 | 1.8  |
| 78 | <i>PIK3CA</i> | H1047R | 127 | FMKQMND <u>AR</u>  | 68    | 0.54  | 34.0 | 12.8 |

|     |             |              |     |             |        |       |      |      |
|-----|-------------|--------------|-----|-------------|--------|-------|------|------|
| 79  |             |              |     | YFMKQMNDAR  | 51     | 0.51  | 26.6 | 10.3 |
| 80  |             |              |     | EYFMKQMNDAR | 64     | 0.21  | 60.6 | 14.9 |
| 81  |             | E545K        | 102 | STRDPLSEITK | 4,567  | 1.50  | 15.4 | 8.0  |
| 82  |             |              |     | SEITKQEKDF  | 43,189 | 40.00 | 2.0  | 1.7  |
| 83  |             |              |     | KQEKDFLWSHR | 7,111  | 5.50  | -0.3 | 3.3  |
| 87  |             | R88Q         | 34  | ETRQLCDLR   | 47     | 0.20  | 33.7 | 11.8 |
| 91  |             | H1047L       | 22  | ALHGGWTTK   | 6,253  | 3.30  | 7.0  | 1.1  |
| 92  |             | C420R        | 20  | AKEEHRPLAW  | 43,719 | 45.00 | 1.3  | 2.6  |
| 94  | <i>EGFR</i> | L858R        | 122 | QHVKITDFGR  | 278    | 0.98  | 25.4 | 6.2  |
| 95  |             |              |     | HVKITDFGR   | 17     | 0.06  | 54.8 | 9.7  |
| 96  |             |              |     | KITDFGRAK   | 6,302  | 3.60  | 0.1  | 6.5  |
| 98  |             | E746_A750del | 74  | IPVAIKTSPK  | 4,965  | 6.50  | -2.2 | 5.3  |
| 104 |             | T790M        | 1   | MQLMPFGCLL  | 6,040  | 18.00 | -0.7 | 4.6  |
| 106 | <i>BRAF</i> | V600E        | 105 | DFGLATEKSR  | 440    | 0.85  | 3.1  | 0.6  |
| 111 |             | D594G        | 12  | GFGLATVKSR  | 1,482  | 2.30  | -0.5 | 2.3  |

|            |                  |   |   |           |        |      |      |     |
|------------|------------------|---|---|-----------|--------|------|------|-----|
| CMVpp65A02 | CMV- <i>UL83</i> | - | - | NLVPMVATV | 16,395 | 6.60 | 0.8  | 1.5 |
| CMVpp65A24 | CMV- <i>UL83</i> | - | - | QYDPVAALF | 18,074 | 3.80 | -0.6 | 0.2 |

---

<sup>a</sup>Mutation frequency in the HOPE cohort of 5,143 patients.<sup>b</sup>Underlined letters mean AAS positions.<sup>c</sup> $\Delta$ HLA means increasing HLA expression. AAS, amino acid substitution; Freq., frequency; CMV, cytomegalovirus.

---
